# Supplementary material
Source: publisher site journal article supplement (https://www.dovepress.com/article/244344)
Supplement: Supplementary file 1 [file get_supplementary_file.php]

**Supplement Figure A**


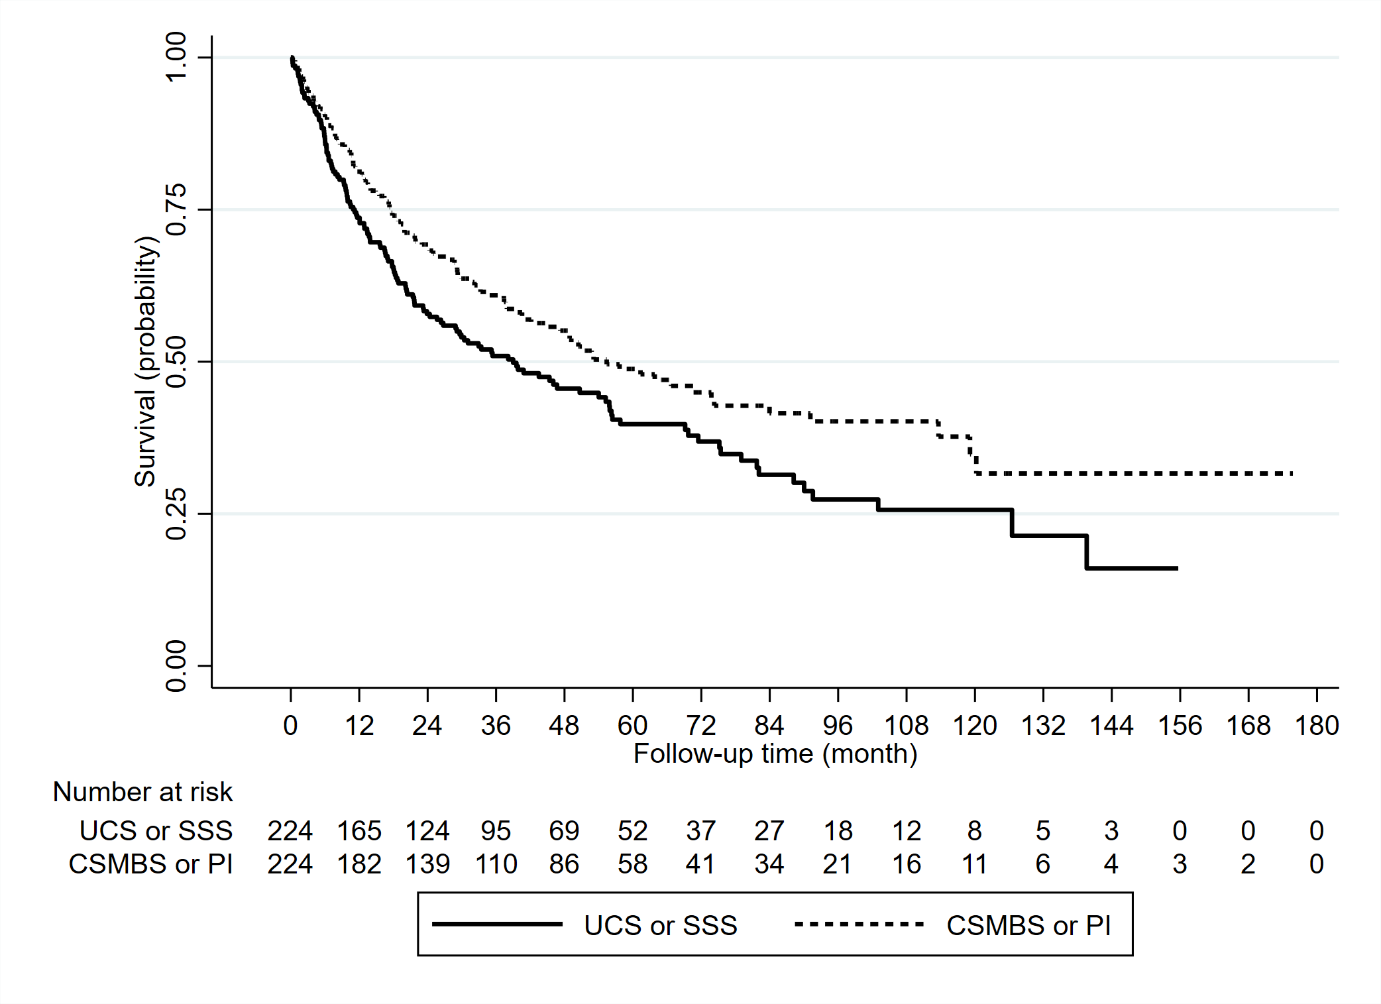


**Figure A** Kaplan-Meier curves illustrating cancer-specific survival (p=0.018) between insurance types (analysis of propensity score matched patient cohort). (*CSMBS = Civil Servant Medical Benefit Scheme, SSS = Social Security Scheme, UCS = Universal Coverage Scheme, PI= Private insurance)*
